# Supplementary material for: COVID-19 Pandemic Experiences and Symptoms of Pandemic-Associated Traumatic Stress Among Mothers in the US
Source: PubMed Central journal article supplement (PMC9856510; doi:10.1001/jamanetworkopen.2022.47330), 2022-12-16
Supplement: jamanetwopen-e2247330-s002.pdf [file jamanetwopen-e2247330-s002.pdf]

\*First name, last name, and suffix (if applicable) are required and will appear in PubMed.

| <b>*Group Name(s): Program Collaborators for Environmental influences on Child Health Outcomes</b> |                   |                              |                  |                                                 |                                          |                                                          |                                                                                            |
|----------------------------------------------------------------------------------------------------|-------------------|------------------------------|------------------|-------------------------------------------------|------------------------------------------|----------------------------------------------------------|--------------------------------------------------------------------------------------------|
| <b>*First Name and Middle Initial(s)</b>                                                           | <b>*Last Name</b> | <b>*Suffix (eg, Jr, III)</b> | Academic Degrees | Institution                                     | Location (city, state/province, country) | Role or Contribution, eg, chair, principal investigator  | Group (if more than 1 Group listed in the byline) and/or Subgroup (eg, Steering Committee) |
| Brian P                                                                                            | Smith             |                              | MD               | Duke Clinical Research Institute                | Durham, North Carolina, USA              | ECHO Coordinating Center Principal Investigator          | ECHO Coordinating Center U2COD023375                                                       |
| Kristen L                                                                                          | Newby             |                              | MD               | Duke Clinical Research Institute                | Durham, North Carolina, USA              | ECHO Coordinating Center Principal Investigator          | ECHO Coordinating Center U2COD023375                                                       |
| Lisa P                                                                                             | Jacobson          |                              | PhD              | Johns Hopkins University                        | Baltimore, Maryland, USA                 | ECHO Data Analysis Center Principal Investigator         | ECHO Data Analysis Center U24D023382                                                       |
| Corette B                                                                                          | Parker            |                              | PhD              | Research Triangle Park Institute                | Durham, North Carolina, USA              | ECHO Data Analysis Center Principal Investigator         | ECHO Data Analysis Center U24D023382                                                       |
| Richard C                                                                                          | Gershon           |                              | PhD              | Northwestern University School of Medicine      | Evanston, Illinois, USA                  | ECHO Person Reported Outcome Core Principal Investigator | ECHO Person Reported Outcome Core U24OD023319                                              |
| David                                                                                              | Cella             |                              | PhD              | Northwestern University School of Medicine      | Evanston, Illinois, USA                  | ECHO Person Reported Outcome Core Principal Investigator | ECHO Person Reported Outcome Core U24OD023319                                              |
| Akram N                                                                                            | Alshawabkeh       |                              | PhD              | Northeastern University                         | Boston, Massachusetts, USA               | ECHO Cohort Principal Investigator                       | ECHO Cohort UH3OD023251                                                                    |
| Judy L                                                                                             | Aschner           |                              | MD               | Albert Einstein College of Medicine             | Bronx, New York, USA                     | ECHO Cohort Principal Investigator                       | ECHO Cohort UH3OD023320                                                                    |
| Stephanie L                                                                                        | Merhar            |                              | MD               | Cincinnati Children's Hospital Medical Center   | Cincinnati, Ohio, USA                    | ECHO Cohort Principal Investigator                       | ECHO Cohort UH3OD023320                                                                    |
| Clement L                                                                                          | Ren               |                              | MD               | Indiana University, Riley Hospital for Children | Indianapolis, IN, USA                    | ECHO Cohort Principal Investigator                       | ECHO Cohort UH3OD023320                                                                    |

## Supplemental Online Content: Nonauthor Collaborators

\*First name, last name, and suffix (if applicable) are required and will appear in PubMed.

| *First Name and Middle Initial(s) | *Last Name  | *Suffix (eg, Jr, III) | Academic Degrees | Institution                                                                | Location (city, state/province, country) | Role or Contribution, eg, chair, principal investigator | Group (if more than 1 Group listed in the byline) and/or Subgroup (eg, Steering Committee) |
|-----------------------------------|-------------|-----------------------|------------------|----------------------------------------------------------------------------|------------------------------------------|---------------------------------------------------------|--------------------------------------------------------------------------------------------|
| Anne Marie                        | Reynolds    |                       | MD               | University of Buffalo, Jacobson School of Medicine and Biomedical Sciences | Buffalo, NY, USA                         | ECHO Cohort Principal Investigator                      | ECHO Cohort UH3OD023320                                                                    |
| Roberta                           | Keller      |                       | MD               | University of California                                                   | San Francisco, CA, USA                   | ECHO Cohort Principal Investigator                      | ECHO Cohort UH3OD023320                                                                    |
| Gloria S                          | Pryhuber    |                       | MD               | University of Rochester Medical Center                                     | Rochester, NY, USA                       | ECHO Cohort Principal Investigator                      | ECHO Cohort UH3OD023320                                                                    |
| Andrea J                          | Duncan      |                       | MD               | University of Texas Health Sciences Center                                 | Houston, TX, USA                         | ECHO Cohort Principal Investigator                      | ECHO Cohort UH3OD023320                                                                    |
| Paul E                            | Moore       |                       | MD               | Vanderbilt Children's Hospital                                             | Nashville, TN, USA                       | ECHO Cohort Principal Investigator                      | ECHO Cohort UH3OD023320                                                                    |
| Andrea L                          | Lampland    |                       | MD               | Children's Hospital and Clinic                                             | Minneapolis, MN, USA                     | ECHO Cohort Principal Investigator                      | ECHO Cohort UH3OD023320                                                                    |
| Rajan                             | Wadhawan    |                       | MD               | Florida Hospital for Children                                              | Orlando, FL, USA                         | ECHO Cohort Principal Investigator                      | ECHO Cohort UH3OD023320                                                                    |
| Carol L                           | Wagner      |                       | MD               | Medical University of South Carolina                                       | Charleston, SC, USA                      | ECHO Cohort Principal Investigator                      | ECHO Cohort UH3OD023320                                                                    |
| Mark L                            | Hudak       |                       | MD               | University of Florida College of Medicine                                  | Jacksonville, FL, USA                    | ECHO Cohort Principal Investigator                      | ECHO Cohort UH3OD023320                                                                    |
| Dennis E                          | Mayock      |                       | MD               | University of Washington                                                   | Seattle, WA, USA                         | ECHO Cohort Principal Investigator                      | ECHO Cohort UH3OD023320                                                                    |
| Lisa K                            | Walshburn   |                       | MD               | Wake Forest University School of Medicine                                  | Winston Salem, NC                        | ECHO Cohort Principal Investigator                      | ECHO Cohort UH3OD023320                                                                    |
| Susan L                           | Teitelbaum  |                       | PhD              | Icahn School of Medicine at Mount Sinai                                    | New York, NY, USA                        | ECHO Cohort Principal Investigator                      | ECHO Cohort UH3OD023320                                                                    |
| Annemarie                         | Stroustrup  |                       | MD               | Icahn School of Medicine at Mount Sinai                                    | New York, NY, USA                        | ECHO Cohort Principal Investigator                      | ECHO Cohort UH3OD023320                                                                    |
| Clancy B                          | Blair       |                       | PhD              | New York University                                                        | New York, NY, USA                        | ECHO Cohort Principal Investigator                      | ECHO Cohort UH3OD023332                                                                    |
| Lisa                              | Gatzke-Kopp |                       | PhD              | Pennsylvania State University                                              | University Park, PA, USA                 | ECHO Cohort Principal Investigator                      | ECHO Cohort UH3OD023332                                                                    |

## Supplemental Online Content: Nonauthor Collaborators

\*First name, last name, and suffix (if applicable) are required and will appear in PubMed.

| *First Name and Middle Initial(s) | *Last Name | *Suffix (eg, Jr, III) | Academic Degrees | Institution                                                | Location (city, state/province, country) | Role or Contribution, eg, chair, principal investigator | Group (if more than 1 Group listed in the byline) and/or Subgroup (eg, Steering Committee) |
|-----------------------------------|------------|-----------------------|------------------|------------------------------------------------------------|------------------------------------------|---------------------------------------------------------|--------------------------------------------------------------------------------------------|
| Margaret M                        | Swingler   |                       | PhD              | University of North Carolina                               | Chapel Hill, NC, USA                     | ECHO Cohort Principal Investigator                      | ECHO Cohort UH3OD023332                                                                    |
| Carlos                            | Camargo    |                       | MD               | Massachusetts General Hospital                             | Boston, MA, USA                          | ECHO Cohort Principal Investigator                      | ECHO Cohort UH3OD023253                                                                    |
| Jonathan M                        | Mansbach   |                       | MD               | Boston Children's Hospital                                 | Boston, MA, USA                          | ECHO Cohort Principal Investigator                      | ECHO Cohort UH3OD023253                                                                    |
| Jonathan M                        | Spergel    |                       | MD               | Children's Hospital of Philadelphia                        | Philadelphia, PA, USA                    | ECHO Cohort Principal Investigator                      | ECHO Cohort UH3OD023253                                                                    |
| Michelle D                        | Stevenson  |                       | MD               | Norton Children's Hospital                                 | Louisville, KY, USA                      | ECHO Cohort Principal Investigator                      | ECHO Cohort UH3OD023253                                                                    |
| Cindy S                           | Bauer      |                       | MD               | Phoenix Children's Hospital                                | Phoenix AZ, USA                          | ECHO Cohort Principal Investigator                      | ECHO Cohort UH3OD023253                                                                    |
| Dana                              | Dabelea    |                       | MD               | University of Colorado Denver                              | Denver, CO, USA                          | ECHO Cohort Principal Investigator                      | ECHO Cohort UH3OD023248                                                                    |
| Sean CL                           | Deoni      |                       | PhD              | Memorial Hospital of Rhode Island                          | Providence RI, USA                       | ECHO Cohort Principal Investigator                      | ECHO Cohort UH3OD023313                                                                    |
| Cristiane                         | Duarte     |                       | PhD              | New York State Psychiatric Institute                       | New York, NY, USA                        | ECHO Cohort Principal Investigator                      | ECHO Cohort UH3OD023328                                                                    |
| Glorisa J                         | Canino     |                       | PhD              | University of Puerto Rico                                  | San Jaun, PR,                            | ECHO Cohort Principal Investigator                      | ECHO Cohort UH3OD023328                                                                    |
| Anne L                            | Dunlop     |                       | MD               | Emory University                                           | Atlanta, GA, USA                         | ECHO Cohort Principal Investigator                      | ECHO Cohort UH3OD023318                                                                    |
| Amy J                             | Elliott    |                       | PhD              | Avera Health Rapid City                                    | Rapid City, SD, USA                      | ECHO Cohort Principal Investigator                      | ECHO Cohort UH3OD023279                                                                    |
| Assiamira M                       | Ferrara    |                       | MD               | Kaiser Permanente Northern California Division of Research | Oakland, CA, USA                         | ECHO Cohort Principal Investigator                      | ECHO Cohort UH3OD023289                                                                    |
| Lisa A                            | Croen      |                       | PhD              | Kaiser Permanente Northern California Division of Research | Oakland, CA, USA                         | ECHO Cohort Principal Investigator                      | ECHO Cohort UH3OD023289                                                                    |
| James E                           | Gern       |                       | MD               | University of Wisconsin                                    | Madison WI, USA                          | ECHO Cohort Principal Investigator                      | ECHO Cohort UH3OD023282                                                                    |
| Edward M                          | Zoratti    |                       | MD               | Henry Ford Health System                                   | Detroit, MI                              | ECHO Cohort Principal Investigator                      | ECHO Cohort UH3OD023282                                                                    |

## Supplemental Online Content: Nonauthor Collaborators

\*First name, last name, and suffix (if applicable) are required and will appear in PubMed.

| *First Name and Middle Initial(s) | *Last Name       | *Suffix (eg, Jr, III) | Academic Degrees | Institution                                                                            | Location (city, state/province, country) | Role or Contribution, eg, chair, principal investigator | Group (if more than 1 Group listed in the byline) and/or Subgroup (eg, Steering Committee) |
|-----------------------------------|------------------|-----------------------|------------------|----------------------------------------------------------------------------------------|------------------------------------------|---------------------------------------------------------|--------------------------------------------------------------------------------------------|
| Christine M                       | Seroogy          |                       | MD               | Marshfield Clinic Research Institute                                                   | Marshfield, WI, USA                      | ECHO Cohort Principal Investigator                      | ECHO Cohort UH3OD023282                                                                    |
| Casper G                          | Bendixsen        |                       | PhD              | Marshfield Clinic Research Institute                                                   | Marshfield, WI, USA                      | ECHO Cohort Principal Investigator                      | ECHO Cohort UH3OD023282                                                                    |
| Leonard B                         | Bacharier        |                       | MD               | Boston Medical Center                                                                  | Boston MA, USA                           | ECHO Cohort Principal Investigator                      | ECHO Cohort UH3OD023282                                                                    |
| George T                          | O'Connor         |                       | MD               | Boston Medical Center                                                                  | Boston MA, USA                           | ECHO Cohort Principal Investigator                      | ECHO Cohort UH3OD023282                                                                    |
| Meyer                             | Kattan           |                       | MD               | Children's Hospital of New York                                                        | New York, NY, USA                        | ECHO Cohort Principal Investigator                      | ECHO Cohort UH3OD023282                                                                    |
| Robert A                          | Wood             |                       | MD               | Johns Hopkins University, School of Medicine                                           | Baltimore, MD, USA                       | ECHO Cohort Principal Investigator                      | ECHO Cohort UH3OD023282                                                                    |
| Katherine                         | Rivera-Spoljaric |                       | MD               | Washington University in St Louis                                                      | St Louis, MO, USA                        | ECHO Cohort Principal Investigator                      | ECHO Cohort UH3OD023282                                                                    |
| Tina V                            | Hartert          |                       | MD               | Vanderbilt University                                                                  | Nashville TN, USA                        | ECHO Cohort Principal Investigator                      | ECHO Cohort UH3OD023282                                                                    |
| Christine C                       | Johnson          |                       | PhD              | Henry Ford Health System                                                               | Detroit, MI, USA                         | ECHO Cohort Principal Investigator                      | ECHO Cohort UH3OD023282                                                                    |
| Anne M                            | Singh            |                       | MD               | University of Wisconsin                                                                | Madison, WI, USA                         | ECHO Cohort Principal Investigator                      | ECHO Cohort UH3OD023282                                                                    |
| Irva                              | Hertz-Picciotto  |                       | MD               | University of California Davis Mind Institute                                          | Sacramento, CA, USA                      | ECHO Cohort Principal Investigator                      | ECHO Cohort UH3OD023365                                                                    |
| Alison E                          | Hipwell          |                       | PhD              | University of Pittsburgh                                                               | Pittsburgh, PA, USA                      | ECHO Cohort Principal Investigator                      | ECHO Cohort UH3OD023244                                                                    |
| Catherine J                       | Karr             |                       | MD               | University of Washington, Department of Environmental and Occupational Health Sciences | Seattle, WA, USA                         | ECHO Cohort Principal Investigator                      | ECHO Cohort UH3OD023271                                                                    |
| Alex                              | Mason            |                       | PhD              | University of Tennessee Health Science Center                                          | Memphis, TN, USA                         | ECHO Cohort Principal Investigator                      | ECHO Cohort UH3OD023271                                                                    |
| Sheela                            | Sathyanarayana   |                       | MD               | Seattle Children's Research Institute                                                  | Seattle, WA                              | ECHO Cohort Principal Investigator                      | ECHO Cohort UH3OD023271                                                                    |

## Supplemental Online Content: Nonauthor Collaborators

\*First name, last name, and suffix (if applicable) are required and will appear in PubMed.

| *First Name and Middle Initial(s) | *Last Name  | *Suffix (eg, Jr, III) | Academic Degrees | Institution                                                               | Location (city, state/province, country) | Role or Contribution, eg, chair, principal investigator | Group (if more than 1 Group listed in the byline) and/or Subgroup (eg, Steering Committee) |
|-----------------------------------|-------------|-----------------------|------------------|---------------------------------------------------------------------------|------------------------------------------|---------------------------------------------------------|--------------------------------------------------------------------------------------------|
| Barry M                           | Lester      |                       | PhD              | Women & Infants Hospital of Rhode Island                                  | Providence RI, USA                       | ECHO Cohort Principal Investigator                      | ECHO Cohort UH3OD023347                                                                    |
| Brian S                           | Carter      |                       | MD               | Children's Mercy                                                          | Kansas City, MO, USA                     | ECHO Cohort Principal Investigator                      | ECHO Cohort UH3OD023347                                                                    |
| Carmen J                          | Marsit      |                       | PhD              | Emory University                                                          | Atlanta, GA, USA                         | ECHO Cohort Principal Investigator                      | ECHO Cohort UH3OD023347                                                                    |
| Steven L                          | Pastyrnak   |                       | PhD              | Helen DeVos Children's Hospital                                           | Grand Rapids, MI, USA                    | ECHO Cohort Principal Investigator                      | ECHO Cohort UH3OD023347                                                                    |
| Charles                           | Neal        |                       | MD               | Kapiolani Medical Center for Women and Children                           | Providence, RI, USA                      | ECHO Cohort Principal Investigator                      | ECHO Cohort UH3OD023347                                                                    |
| Lynne M                           | Smith       |                       | MD               | Los Angeles Biomedical Research Institute at Harbour-UCLA Medical Center  | Los Angeles CA, USA                      | ECHO Cohort Principal Investigator                      | ECHO Cohort UH3OD023347                                                                    |
| Jennifer B                        | Helderman   |                       | MD               | Wake Forest University School of Medicine                                 | Winston Salem, NC                        | ECHO Cohort Principal Investigator                      | ECHO Cohort UH3OD023347                                                                    |
| Leslie D                          | Leve        |                       | PhD              | Prevention Science Institute, University of Oregon                        | Eugene, OR, USA                          | ECHO Cohort Principal Investigator                      | ECHO Cohort UH3OD023389                                                                    |
| Jenae M                           | Neiderhiser |                       | PhD              | Pennsylvania State University                                             | University Park, PA, USA                 | ECHO Cohort Principal Investigator                      | ECHO Cohort UH3OD023389                                                                    |
| Scott T                           | Weiss       |                       | MD               | Brigham and Women's Hospital                                              | Boston, MA, USA                          | ECHO Cohort Principal Investigator                      | ECHO Cohort UH3OD023268                                                                    |
| Robert                            | Zeiger      |                       | MD               | Kaiser Permanente, Southern California                                    | San Diego, CA, USA                       | ECHO Cohort Principal Investigator                      | ECHO Cohort UH3OD023268                                                                    |
| Cindy                             | McEvoy      |                       | MD               | Oregon Health and Science University                                      | Portland, OR, USA                        | ECHO Cohort Principal Investigator                      | ECHO Cohort UH3OD023288                                                                    |
| Robert S                          | Tepper      |                       | MD               | Indiana University, Riley Hospital for Children                           | Indianapolis, IN, USA                    | ECHO Cohort Principal Investigator                      | ECHO Cohort UH3OD023288                                                                    |
| Kristen                           | Lyall       |                       | ScD              | Drexel Autism Institute                                                   | Philadelphia, PA, USA                    | ECHO Cohort Principal Investigator                      | ECHO Cohort UH3OD023342                                                                    |
| Rebecca                           | Landa       |                       | PhD              | Johns Hopkins Bloomberg School of Public Health Kennedy Krieger Institute | Baltimore, MD, USA                       | ECHO Cohort Principal Investigator                      | ECHO Cohort UH3OD023342                                                                    |

## Supplemental Online Content: Nonauthor Collaborators

\*First name, last name, and suffix (if applicable) are required and will appear in PubMed.

| *First Name and Middle Initial(s) | *Last Name | *Suffix (eg, Jr, III) | Academic Degrees | Institution                                                      | Location (city, state/province, country) | Role or Contribution, eg, chair, principal investigator | Group (if more than 1 Group listed in the byline) and/or Subgroup (eg, Steering Committee) |
|-----------------------------------|------------|-----------------------|------------------|------------------------------------------------------------------|------------------------------------------|---------------------------------------------------------|--------------------------------------------------------------------------------------------|
| Sally J                           | Ozonoff    |                       | PhD              | University of California, UC Davis Medical Center Mind Institute | Sacramento, CA, USA                      | ECHO Cohort Principal Investigator                      | ECHO Cohort UH3OD023342                                                                    |
| Stephen R                         | Dager      |                       | MD               | University of Washington                                         | Seattle, WA, USA                         | ECHO Cohort Principal Investigator                      | ECHO Cohort UH3OD023342                                                                    |
| Robert T                          | Schultz    |                       | PhD              | Children's Hospital of Philadelphia - Center for Autism Research | Philadelphia, PA, USA                    | ECHO Cohort Principal Investigator                      | ECHO Cohort UH3OD023342                                                                    |
| Joseph                            | Piven      |                       | MD               | University of North Carolina at Chapel Hill                      | Chapel Hill, NC, USA                     | ECHO Cohort Principal Investigator                      | ECHO Cohort UH3OD023342                                                                    |
| Heather                           | Volk       |                       | PhD              | Johns Hopkins Bloomberg School of Public Health                  | Baltimore, Maryland, USA                 | ECHO Cohort Principal Investigator                      | ECHO Cohort UH3OD023342                                                                    |
| Thomas G                          | O'Connor   |                       | PhD              | University of Rochester Medical Center Rochester                 | New York, NY, USA                        | ECHO Cohort Principal Investigator                      | ECHO Cohort UH3OD023349                                                                    |
| Hyagriv                           | Simhan     |                       | MD               | University of Pittsburgh Medical Center, Magee Women's Hospital  | Pittsburgh, PA, USA                      | ECHO Cohort Principal Investigator                      | ECHO Cohort UH3OD023349                                                                    |
| Emily                             | Oken       |                       | MD               | Harvard Pilgrim Health Care Institute                            | Boston, MA, USA                          | ECHO Cohort Principal Investigator                      | ECHO Cohort UH3OD023286                                                                    |
| Michael                           | O'Shea     |                       | MD               | University of North Carolina                                     | Chapel Hill, NC                          | ECHO Cohort Principal Investigator                      | ECHO Cohort UH3OD023348                                                                    |
| Ruben                             | Vaidya     |                       | MD               | Baystate Children's Hospital                                     | Springfield, MA, USA                     | ECHO Cohort Principal Investigator                      | ECHO Cohort UH3OD023348                                                                    |
| Rawad                             | Obeid      |                       | MD               | Beaumont Health Medical Center                                   | Royal Oak, MI, USA                       | ECHO Cohort Principal Investigator                      | ECHO Cohort UH3OD023348                                                                    |
| Caitlin                           | Rollins    |                       | MD               | Boston Children's Hospital                                       | Boston, MA, USA                          | ECHO Cohort Principal Investigator                      | ECHO Cohort UH3OD023348                                                                    |
| Kelly A                           | Bear       |                       | DO               | East Carolina University Brody School of Medicine                | Greenville, NC                           | ECHO Cohort Principal Investigator                      | ECHO Cohort UH3OD023348                                                                    |
| Madeleine                         | Lenski     |                       | MS               | Michigan State University College of Human Medicine              | East Lansing, MI, USA                    | ECHO Cohort Principal Investigator                      | ECHO Cohort UH3OD023348                                                                    |
| Michael E                         | Msall      |                       | MD               | University of Chicago                                            | Chicago IL, USA                          | ECHO Cohort Principal Investigator                      | ECHO Cohort UH3OD023348                                                                    |
| Lisa K                            | Washburn   |                       | MD               | Wake Forest Baptist Health (Atrium Health),                      | Winston Salem, NC                        | ECHO Cohort Principal Investigator                      | ECHO Cohort UH3OD023348                                                                    |

## Supplemental Online Content: Nonauthor Collaborators

\*First name, last name, and suffix (if applicable) are required and will appear in PubMed.

| *First Name and Middle Initial(s) | *Last Name    | *Suffix (eg, Jr, III) | Academic Degrees | Institution                                      | Location (city, state/province, country) | Role or Contribution, eg, chair, principal investigator | Group (if more than 1 Group listed in the byline) and/or Subgroup (eg, Steering Committee) |
|-----------------------------------|---------------|-----------------------|------------------|--------------------------------------------------|------------------------------------------|---------------------------------------------------------|--------------------------------------------------------------------------------------------|
| Angela M                          | Montgomery    |                       | MD               | Yale School of Medicine                          | New Haven, CT, USA                       | ECHO Cohort Principal Investigator                      | ECHO Cohort UH3OD023348                                                                    |
| Jean                              | Kerver        |                       | PhD              | Michigan State University                        | East Lansing, MI, USA                    | ECHO Cohort Principal Investigator                      | ECHO Cohort UH3OD023285                                                                    |
| Charles                           | Barone        |                       | MD               | Henry Ford Health System                         | Detroit, MI, USA                         | ECHO Cohort Principal Investigator                      | ECHO Cohort UH3OD023285                                                                    |
| Patricia                          | McKane        |                       | DVM              | Michigan Department of Health and Human Services | Lansing, MI, USA                         | ECHO Cohort Principal Investigator                      | ECHO Cohort UH3OD023285                                                                    |
| Nigel                             | Paneth        |                       | MD               | Michigan State University                        | East Lansing, MI, USA                    | ECHO Cohort Principal Investigator                      | ECHO Cohort UH3OD023285                                                                    |
| Michael R                         | Elliott       |                       | PhD              | University of Michigan                           | Ann Arbor, MI, USA                       | ECHO Cohort Principal Investigator                      | ECHO Cohort UH3OD023285                                                                    |
| Susan L                           | Schantz       |                       | PhD              | University of Illinois, Beckman Institute        | Urbana, IL, USA                          | ECHO Cohort Principal Investigator                      | ECHO Cohort UH3OD023272                                                                    |
| Tracey J                          | Woodruff      |                       | PhD              | University of California, San Francisco          | San Francisco, CA, USA                   | ECHO Cohort Principal Investigator                      | ECHO Cohort UH3OD023272                                                                    |
| Joseph B                          | Stanford      |                       | MD               | University of Utah                               | Salt Lake City, UT, USA                  | ECHO Cohort Principal Investigator                      | ECHO Cohort UH3OD023249                                                                    |
| Christy A                         | Porucznik     |                       | PhD              | University of Utah                               | Salt Lake City, UT, USA                  | ECHO Cohort Principal Investigator                      | ECHO Cohort UH3OD023249                                                                    |
| Robert M                          | Silver        |                       | MD               | University of Utah                               | Salt Lake City, UT, USA                  | ECHO Cohort Principal Investigator                      | ECHO Cohort UH3OD023249                                                                    |
| Elisabeth                         | Conradt       |                       | PhD              | University of Utah                               | Salt Lake City, UT, USA                  | ECHO Cohort Principal Investigator                      | ECHO Cohort UH3OD023249                                                                    |
| Leonardo                          | Trasande      |                       | MD               | New York School of Medicine                      | New York, NY, USA                        | ECHO Cohort Principal Investigator                      | ECHO Cohort UH3OD023305                                                                    |
| Rosalind J                        | Wright        |                       | MD               | Icahn School of Medicine at Mount Sinai          | New York, NY, USA                        | ECHO Cohort Principal Investigator                      | ECHO Cohort UH3OD023337                                                                    |
| Michelle                          | Bosquet-Enlow |                       | phD              | Boston Children's Hospital                       | Boston MA, USA                           | ECHO Cohort Principal Investigator                      | ECHO Cohort UH3OD023337                                                                    |
| Kathi                             | Huddleston    |                       | PhD              | George Mason University                          | Fairfax, VA, USA                         | ECHO Cohort Principal Investigator                      | ECHO Cohort UH3OD023337                                                                    |

Supplemental Online Content: Nonauthor Collaborators

\*First name, last name, and suffix (if applicable) are required and will appear in PubMed.

| *First Name and Middle Initial(s) | *Last Name | *Suffix (eg, Jr, III) | Academic Degrees | Institution                             | Location (city, state/province, country) | Role or Contribution, eg, chair, principal investigator | Group (if more than 1 Group listed in the byline) and/or Subgroup (eg, Steering Committee) |
|-----------------------------------|------------|-----------------------|------------------|-----------------------------------------|------------------------------------------|---------------------------------------------------------|--------------------------------------------------------------------------------------------|
| Nicole                            | Bush       |                       | PhD              | University of California, San Francisco | San Francisco CA, USA                    | ECHO Cohort Principal Investigator                      | ECHO Cohort UH3OD023271 and UH3OD023282                                                    |
| Ruby HN                           | Nguyen     |                       | PhD              | University of Minnesota                 | Minneapolis, MN, USA                     | ECHO Cohort Principal Investigator                      | ECHO Cohort UH3OD023271 and UH3OD023282                                                    |
| Emily S                           | Barrett    |                       | PhD              | University of Rochester Medical Center  | Rochester, NY, USA                       | ECHO Cohort Principal Investigator                      | ECHO Cohort UH3OD023271 and UH3OD023282                                                    |
